# Supplementary material for: Fabrication of boron doped diamond chip electrodes for single drop analysis
Source: Royal Society of Chemistry journal article supplement (doi:10.1039/c3ra44090g), 2013-01-01
Supplement: c3ra44090g.pdf [file c3ra44090g.pdf]

Supporting information for

**Fabrication of Boron Doped Diamond Chip Electrodes for Single Drop Analysis**

Ai Sugitani,<sup>a</sup> Michinobu Katayama,<sup>b</sup> Takeshi Watanabe,<sup>a</sup> Yoshinori Matsumoto,<sup>b</sup> and  
Yasuaki Einaga<sup>ac\*</sup>

<sup>a</sup> Department of Chemistry, Keio University, 3-14-1 Hiyoshi, Yokohama 223-8522,  
Japan

<sup>b</sup> Department of Applied Physics and Physico-Informatics, Keio University, 3-14-1  
Hiyoshi, Yokohama 223-8522, Japan

<sup>c</sup> JST-CREST, 3-14-1 Hiyoshi, Yokohama 223-8522, Japan

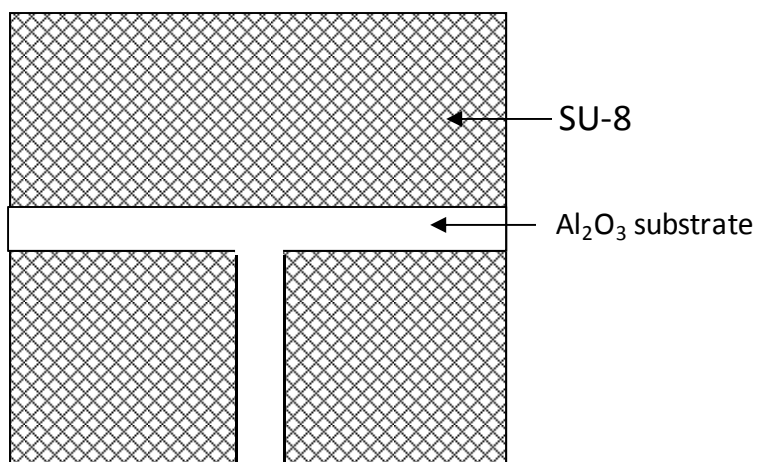

**Figure S1** Top view of Figure 1(e).

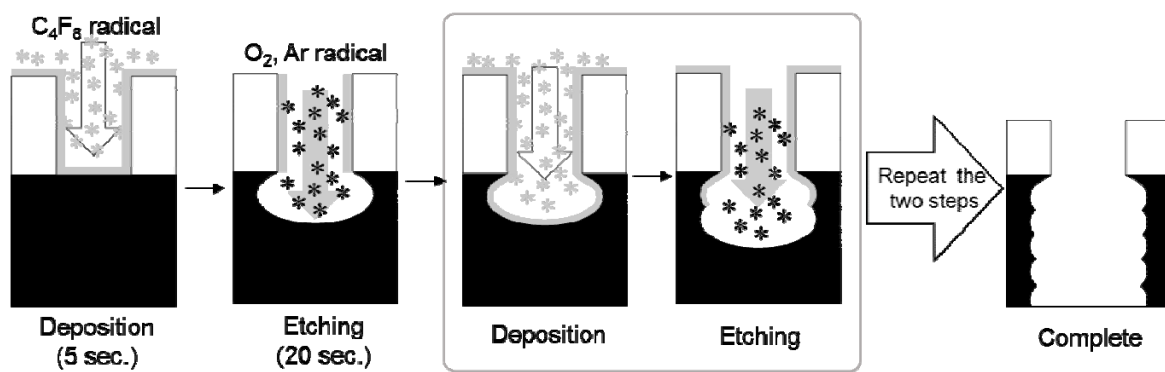

**Figure S2.** Schematic illustration of the Bosch process.

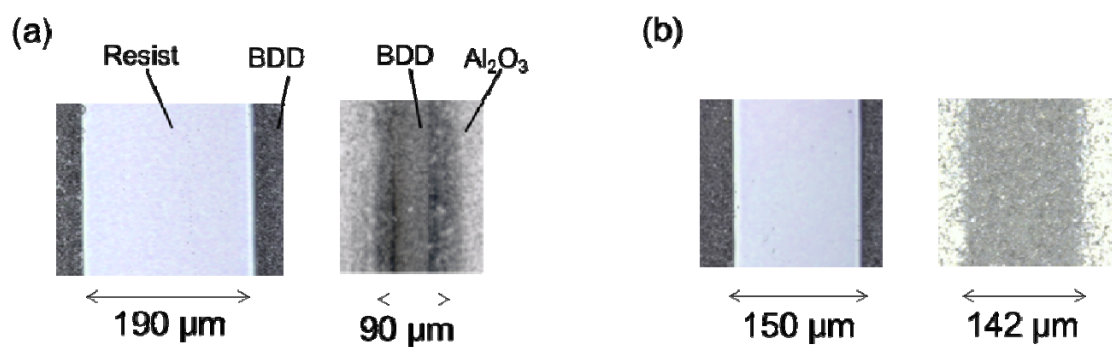

**Figure S3.** Digital microscope images before and after the ICP-RIE process.

(a) Conventional process: (left) before and (right) after the ICP-RIE process.

(b) Bosch process: (left) before and (right) after the ICP-RIE process.

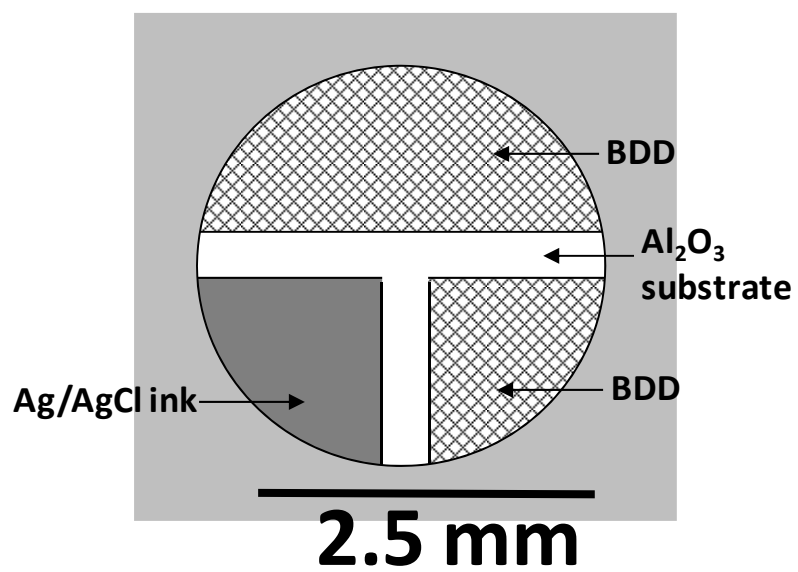

**Figure S4.** Schematic illustration of 'BDD chip electrode'. Single drop sample is in the circle area.

**Table S1.** Process conditions for the Bosch process.

|                       |                                         |
|-----------------------|-----------------------------------------|
| Etching gas           | O <sub>2</sub> : 17 sccm Ar: 32 sccm    |
| Deposition gas        | C <sub>4</sub> F <sub>8</sub> : 85 sccm |
| Etching time          | 20 sec                                  |
| Passivation time      | 5sec                                    |
| Cycle                 | 150 times                               |
| Time                  | 62 min                                  |
| Pressure(etching)     | 5 Pa                                    |
| Pressure(passivation) | 3.3 Pa                                  |
| Power                 | 600 W                                   |
| Substrate bias        | 25 W                                    |
| Set                   | 4 (total 248 min)                       |

**Table S2.** Electrochemical parameters for the redox behavior (10 mM  $K_4Fe(CN)_6$  in 1M KCl solution with the BDD chip electrode) obtained from Figure 3a.

| Scan rate,<br>$v$ (mV/s)                                 | 10    | 20    | 50    | 100   |
|----------------------------------------------------------|-------|-------|-------|-------|
| Anodic peak potential,<br>$E_{pa}$ (mV)                  | 278   | 284   | 291   | 299   |
| Cathodic peak<br>potential, $E_{pc}$ (mV)                | 198   | 202   | 197   | 191   |
| Half peak potential,<br>$E_{1/2}$ (mV)                   | 238   | 243   | 244   | 245   |
| Anodic peak current,<br>$I_{pa}$ ( $\mu A$ )             | 8.92  | 12.3  | 18.0  | 23.7  |
| Cathodic peak current,<br>$I_{pc}$ ( $\mu A$ )           | -9.13 | -12.0 | -17.3 | -22.3 |
| Ratio of peak currents,<br>$I_{pa}/I_{pc}$               | -0.98 | -1.04 | -1.05 | -1.07 |
| Calculated anodic peak<br>current, $I_{pa}'$ ( $\mu A$ ) | 8.68  | 12.3  | 19.4  | 27.4  |
